# Supplementary material for: A small climate-amplifying effect of climate-carbon cycle feedback
Source: PubMed Central journal article supplement (PMC8134589; doi:10.1038/s41467-021-22392-w), 2021-05-19
Supplement: 41467_2021_22392_MOESM1_ESM.pdf [file 41467_2021_22392_MOESM1_ESM.pdf]

## *Supplementary information for*

### **A small climate-amplifying effect of climate-carbon cycle feedback**

Xuanze Zhang<sup>1,2\*</sup>, Ying-Ping Wang<sup>3,4\*</sup>, Peter J. Rayner<sup>5</sup>, Philippe Ciais<sup>6</sup>, Kun Huang<sup>2</sup>, Yiqi Luo<sup>7</sup>, Shilong Piao<sup>8</sup>, Zhonglei Wang<sup>9</sup>, Jianyang Xia<sup>2</sup>, Wei Zhao<sup>10</sup>, Xiaogu Zheng<sup>11</sup>, Jing Tian<sup>1</sup> and Yongqiang Zhang<sup>1\*</sup>

<sup>1</sup> Key Laboratory of Water Cycle and Related Land Surface Processes, Institute of Geographical Sciences and Natural Resources Research, Chinese Academy of Sciences, Beijing 100101, China.

<sup>2</sup> Research Center for Global Change and Ecological Forecasting, School of Ecological and Environmental Science, East China Normal University, Shanghai 200241, China.

<sup>3</sup> Terrestrial Biogeochemistry Group, South China Botanical Garden, Chinese Academy of Sciences, Guangzhou 510650, China.

<sup>4</sup> CSIRO Oceans and Atmosphere, Private Bag 1, Aspendale, Victoria 3195, Australia.

<sup>5</sup> School of Earth Sciences, University of Melbourne, Parkville, Victoria 3010, Australia.

<sup>6</sup> Laboratoire des Sciences du Climat et de l'Environnement, LSCE/IPSL, CEA-CNRS-UVSQ, Université Paris-Saclay, 91191 Gif-sur-Yvette, France.

<sup>7</sup> Center for Ecosystem Science and Society, Northern Arizona University, Arizona, Flagstaff, USA.

<sup>8</sup> Sino-French Institute for Earth System Science, College of Urban and Environmental Sciences, Peking University, Beijing 100871, China.

<sup>9</sup> Wang Yanan Institute for Studies in Economics (WISE) and School of Economics, Xiamen University, Xiamen 361005, China.

<sup>10</sup> National Meteorological Center, China Meteorological Administration, Beijing 100081, China.

<sup>11</sup> Key Laboratory of Regional Climate-Environment Research for East Asia, Institute of Atmospheric Physics, Chinese Academy of Sciences, Beijing 100190, China.

\*Correspondence to: Xuanze Zhang (xuanzezhang@igsnr.ac.cn); Ying-Ping Wang (yingping.wang@csiro.au); Yongqiang Zhang (zhangyq@igsnr.ac.cn)

## **Supplementary Information**

Supplementary Texts 1-3, Tables 1-4, Figures 1-11, and References.

### Text 1. Estimating $\beta_k^{BGC}$ and $\gamma_k^{RAD}$ across different timescales using CMIP5 simulations

We developed a new method for quantifying the two feedback parameters on timescales of  $\Delta t$  years ( $\Delta t = 2, \dots, N - 1$ ), based on the FEA approach, see Supplementary Fig.10. The feedback parameters on the timescale of  $\Delta t$  are defined as the average of all feedback parameters calculated from all time intervals ( $n$ ) of  $\Delta t$  over the period of  $N$  years (e.g.  $N = 140$  years for CMIP5 models):  $\beta_k^{BGC} = \frac{1}{n} \sum \beta^{BGC}_i$ ,  $\gamma_k^{RAD} = \frac{1}{n} \sum \gamma^{RAD}_i$ , thus, for  $i = 1, 2, 3, \dots, n$ ,

$$\beta_{k=\Delta t}^{BGC} = \frac{1}{n} \sum \frac{\Delta C_{B,i}^{BGC}}{\Delta C_{A,i}^{BGC}} = \frac{1}{n} \sum \frac{C_B^{BGC}(t_0+(i+1)\Delta t) - C_B^{BGC}(t_0+i\Delta t)}{C_A^{BGC}(t_0+(i+1)\Delta t) - C_A^{BGC}(t_0+i\Delta t)} \quad (S1)$$

$$\gamma_{k=\Delta t}^{RAD} = \frac{1}{n} \sum \frac{\Delta C_{B,i}^{RAD}}{\Delta T_{A,i}^{RAD}} = \frac{1}{n} \sum \frac{C_B^{RAD}(t_0+(i+1)\Delta t) - C_B^{RAD}(t_0+i\Delta t)}{T_A^{RAD}(t_0+(i+1)\Delta t) - T_A^{RAD}(t_0+i\Delta t)} \quad (S2)$$

where  $t_0$  is the first simulation year of model run, and  $n$  is the number of  $\Delta t$  over  $N$  simulation years.  $C_B^{BGC}$  (in GtC) is the total carbon storage in land and ocean from the BGC simulations,  $C_B^{RAD}$  (in GtC) and  $T_A^{RAD}$  (in K) are from the RAD simulations. The cumulative airborne fraction on different timescales for the COU simulations ( $AF_k^{COU}$ ) is

$$AF_{k=\Delta t}^{COU} = \frac{1}{n} \sum \frac{C_A^{COU}(t_0+(i+1)\Delta t) - C_A^{COU}(t_0+i\Delta t)}{C_E(t_0+(i+1)\Delta t) - C_E(t_0+i\Delta t)} \quad (S3)$$

where the total diagnosed emission is  $C_E = \Delta C_A^{COU} + \Delta C_B^{COU}$  from the fully-coupled simulations. According to equation (10), the gain factor over on timescales of  $\Delta t$  years is:

$$g_k^{COU} = 1 - \frac{1}{AF_k^{COU} [1 + \beta_k^{BGC}]} \quad (S4)$$

We estimated the  $\beta_k^{BGC}$  and  $\gamma_k^{RAD}$  across timescales using equations (S3-S4) with the BGC simulations and the RAD simulations with 1% year<sup>-1</sup> increasing atmospheric CO<sub>2</sub> scenario over 140 years from 9 CMIP5 models (BCC-CSM1-1, CanESM2, CESM1-BGC, HadGEM2-ES, IPSL-CM5A-LR, MIROC-ESM, MPI-ESM-LR, NorESM-ME, UVic ESCM2.9) by Arora et al<sup>1</sup>. The  $AF_k^{COU}$  and  $g_k^{COU}$  calculated using the fully-coupled (COU) simulations from CMIP5 models. Results are shown in Supplementary Fig.7.

## Text 2. Estimating $\beta_k^{BGC}$ and $\gamma_k^{COU-BGC}$ across timescales for C<sup>4</sup>MIP coupled/uncoupled simulations

We made use of the coupled and uncoupled simulations of eleven C<sup>4</sup>MIP models<sup>2</sup>, including the early coupled climate-carbon cycle models of BERN-CC, CSM-1, CLIMBER, FRCGC, HadCM3LC, IPSL-CM2C, LLNL, IPSL-CM4-LOOP, MPI, UMD, UVic-2.7, to estimate  $\beta$  and  $\gamma$  across different timescales. All C<sup>4</sup>MIP simulations were forced by anthropogenic fossil fuel emission for 1860-2000 period and by prescribed IPCC SRES A2 CO<sub>2</sub> emission scenario for the 2000-2100 period. Hence, the fully coupled models were emission-driven which calculate the atmospheric CO<sub>2</sub> interactively, with biogeochemically and radiatively coupled in the climate-carbon cycle feedback system. While the “uncoupled” runs in C<sup>4</sup>MIP experiments represent that the radiatively coupled process was not active, so that the physical climate would not be affected by CO<sub>2</sub> emission (e.g. non CO<sub>2</sub>-induced warming). Following the FEA approach developed by Friedlingstein *et al*<sup>2,3</sup>, we further diagnose the  $\beta^{BGC}$  on timescales of  $\Delta t$  years ( $\Delta t = 2, \dots, N - 1$ ) by

$$\beta_{k=\Delta t}^{BGC} = \frac{1}{n} \sum \frac{C_B^{unc}(t_0+(i+1)\Delta t) - C_B^{unc}(t_0+i\Delta t)}{C_A^{unc}(t_0+(i+1)\Delta t) - C_A^{unc}(t_0+i\Delta t)} \quad (S5)$$

where  $t_0$  is the first simulation year ( $t_0 = 1860$ ) of model run, and  $n$  is the number of  $\Delta t$  over  $N (= 2100 - 1860)$  simulation years. where  $C_A^{unc}$  is the atmospheric CO<sub>2</sub> concentration and  $C_B^{unc}$  is the total carbon storage in biosphere (land+ocean), both of which are from the radiatively-uncoupled simulations. The  $\gamma^{COU-BGC}$  on timescales from the fully-coupled and uncoupled simulation of each C<sup>4</sup>MIP model are calculated by,

$$\gamma_{k=\Delta t}^{COU-BGC} = \frac{1}{n} \sum \frac{[C_B^{cou}(t_0+(i+1)\Delta t) - C_B^{cou}(t_0+i\Delta t)] - [C_B^{unc}(t_0+(i+1)\Delta t) - C_B^{unc}(t_0+i\Delta t)]}{T_A^{cou}(t_0+(i+1)\Delta t) - T_A^{cou}(t_0+i\Delta t)} \quad (S6)$$

where  $C_A^{cou}$ ,  $C_B^{cou}$  and  $T_A^{cou}$  are from the fully-coupled simulations. We also estimate the airborne fraction (AF) and the gain factor ( $g$ ) on timescales for each C<sup>4</sup>MIP model using Equations (S3-4) in the Methods section. Results are shown in Supplementary Fig.8.

### **Text 3. Comparison of the nonlinear feedback contributions estimated in this study with previous modeling studies**

In this study, we defined the nonlinear feedback term as:  $f(\beta, \gamma) = [\Delta C_B^{COU} - (\Delta C_B^{BGC} + \Delta C_B^{RAD})] / \Delta C_A^{COU} \Delta T_A^{COU}$  and estimated its contributions to the feedback parameters  $\beta$  and  $\gamma^*$  (in units of GtC ppm<sup>-1</sup> or GtC K<sup>-1</sup>), whereas previous studies (i.e., Gregory et al., 2009; Schwinger et al., 2014)<sup>4, 5</sup> only estimated the nonlinear feedback contributions to the overall carbon uptakes by land and ocean or by ocean only (in units of Gt C) based on model simulations. Schwinger et al. (2014) estimated that the contribution of nonlinearity to the estimated carbon uptake by ocean under fully coupled simulation was relatively small (3.6% to 10.6%). Our results show that the nonlinear feedback ( $f(\beta, \gamma)\Delta C_A$ ) only has very small impact ( $3 \pm 3\%$ ) on the estimated carbon-concentration feedback parameter ( $\beta$  of land + ocean), and that the contribution of nonlinear feedback to the climate-carbon feedback parameter ( $\gamma^*$  or  $\gamma^{COU-BGC}$  of land + ocean) is  $15 \pm 23\%$  across the CMIP5 models (see Supplementary Table 4).

We further estimated the nonlinear contributions to feedback parameters with  $f(\beta, \gamma)$  defined in this study using the published results from Gregory et al., 2009 or Schwinger et al. (2014). We showed that using the modeling result in Schwinger et al. (2014)'s study, the non-linear contribution to the ocean  $\gamma$ -feedback  $\gamma_O^{nl}$  is -9.9 GtC K<sup>-1</sup>, which is about 60% of the total ocean  $\gamma$ -feedback  $\gamma_O^{COU-BGC}$  (-16.6 GtC K<sup>-1</sup>). The non-linear contribution to the ocean  $\gamma$ -feedback  $\beta_O^{nl}$  is -0.053 GtC ppm<sup>-1</sup>, which is only 6.6% of the  $\beta_O^{COU-BGC}$  (0.801 GtC ppm<sup>-1</sup>).

Moreover, by using the result of the HadCM3LC model under the 1% yr<sup>-1</sup> CO<sub>2</sub> increase scenario from Fig.3 in Gregory et al. (2009), we estimated that the non-linear contribution to the land+ocean  $\gamma$ -feedback is -53.84 GtC K<sup>-1</sup> which is 45% of the total land+ocean  $\gamma$ -feedback  $\gamma_B^{COU-BGC}$  (-119 GtC K<sup>-1</sup>), and the non-linear contribution to the land+ocean  $\beta$ -feedback is -0.33 GtC ppm<sup>-1</sup>, which is 20% of the land+ocean  $\beta$ -feedback  $\beta_B^{COU-BGC}$  (1.65 GtC ppm<sup>-1</sup>).

These estimations based on Gregory et al. (2009) are noticeably larger than our results from the nine CMIP5 models (Supplementary Table 4). For example, for the HadGEM2 in CMIP5 models, the largest non-linear contribution to  $\gamma$  is  $-28.71 \text{ GtC K}^{-1}$  (45% of the total  $\gamma$ -feedback) and the largest non-linear contribution to  $\beta$  is  $-0.185 \text{ GtC ppm}^{-1}$  (9.6% of the total  $\beta$ -feedback). However, across CMIP5 models, the non-linear contributions show large spreads (0.2 to 9.6% for  $\beta$ -feedback and 0.8 to 45% for  $\gamma$ -feedback, see Supplementary Table 4), implying that there exist large uncertainties of the nonlinearity in CMIP5 models and the HadCM3LC used in Gregory et al. (2009).

Supplementary Table 1 | Estimates of  $\beta$  from observational datasets over 1880-2017.

| Observational Dataset | $p$<br>(ppm ppm <sup>-1</sup> ) | $\beta$<br>(GtC ppm <sup>-1</sup> ) |
|-----------------------|---------------------------------|-------------------------------------|
| <b>HadCRUT4</b>       | 2.5088<br>±0.3037               | 3.199<br>±0.644                     |
| <b>Berkeley Earth</b> | 2.5024<br>±0.3030               | 3.185<br>±0.642                     |
| <b>GISTEMP</b>        | 2.5233<br>±0.3059               | 3.229<br>±0.648                     |
| <b>NOAAGlobalTemp</b> | 2.5362<br>±0.3078               | 3.257<br>±0.652                     |
| <b>Ensemble Mean</b>  | <b>2.5177</b>                   | <b>3.217</b>                        |
| <b>+/-S.D.</b>        | <b>±0.153</b>                   | <b>±0.323</b>                       |

**Supplementary Table 2 | Estimates of  $\gamma_{100yr}$  from temperature reconstructions and CO<sub>2</sub> ice-core records over 1000-1850 with optimal  $\beta=3.22\pm0.32$  GtC ppm<sup>-1</sup> (Supplementary Table 1).**

| <b>Ice-core CO<sub>2</sub> records</b> | <b>Reconstructed Temperature</b> | <b><math>\eta_{100yr}</math><br/>(ppm °C<sup>-1</sup>)</b> | <b><math>\gamma_{100yr}</math><br/>(GtC °C<sup>-1</sup>)</b> |
|----------------------------------------|----------------------------------|------------------------------------------------------------|--------------------------------------------------------------|
| <b>Low Dome</b>                        | PAGES2k                          | 45.35                                                      | -242.06                                                      |
|                                        | Frank2010                        | 20.75                                                      | -110.74                                                      |
|                                        | Mann2009                         | 32.92                                                      | -175.76                                                      |
|                                        | Mann EIV                         | 23.14                                                      | -123.51                                                      |
|                                        | Moberg2005                       | 10.54                                                      | -56.24                                                       |
| <b>WAIS</b>                            | PAGES2k                          | 28.91                                                      | -154.3                                                       |
|                                        | Frank2010                        | 13.23                                                      | -70.59                                                       |
|                                        | Mann2009                         | 20.99                                                      | -112.04                                                      |
|                                        | Mann EIV                         | 14.75                                                      | -78.73                                                       |
|                                        | Moberg2005                       | 6.72                                                       | -35.85                                                       |
| <b>DML</b>                             | PAGES2k                          | 43.7                                                       | -233.24                                                      |
|                                        | Frank2010                        | 19.99                                                      | -106.7                                                       |
|                                        | Mann2009                         | 31.73                                                      | -169.36                                                      |
|                                        | Mann EIV                         | 22.3                                                       | -119.01                                                      |
|                                        | Moberg2005                       | 10.15                                                      | -54.19                                                       |
| <b>Ensemble Mean</b>                   |                                  | <b>23.01</b>                                               | <b>-122.82</b>                                               |
| <b>+/-S.D.</b>                         |                                  | <b>+/-11.27</b>                                            | <b>+/-60.16</b>                                              |

Supplementary Table 3 | Estimates of  $\beta$  and  $\gamma$  for eleven C<sup>4</sup>MIP models for the periods of 1880-2017 and 1880-2100.

| Model                | $\beta^{BGC}$ (GtC ppm <sup>-1</sup> ) |              | $\gamma^{COU-BGC}$ (GtC K <sup>-1</sup> ) |               |
|----------------------|----------------------------------------|--------------|-------------------------------------------|---------------|
|                      | 1880-2017                              | 1880-2100    | 1880-2017                                 | 1880-2100     |
| <b>BERN-CC</b>       | 3.52                                   | 2.94         | -38.97                                    | -61.23        |
| <b>CCSM-1</b>        | 2.46                                   | 1.97         | -12.97                                    | -21.77        |
| <b>CLIMBER</b>       | 2.47                                   | 1.99         | -17.99                                    | -41.21        |
| <b>FRCGC</b>         | 3.18                                   | 2.36         | -36.29                                    | -72.19        |
| <b>HadCM3LC</b>      | 2.95                                   | 2.14         | -41.19                                    | -113.29       |
| <b>IPSL-CM2C</b>     | 3.49                                   | 3.25         | -13.22                                    | -48.79        |
| <b>IPSL-CM4-LOOP</b> | 3.17                                   | 2.34         | -10.20                                    | -19.05        |
| <b>LLNL</b>          | 4.27                                   | 3.70         | -25.89                                    | -32.71        |
| <b>MPI</b>           | 3.27                                   | 2.50         | -36.83                                    | -44.11        |
| <b>UMD</b>           | 1.67                                   | 1.71         | -30.64                                    | -52.22        |
| <b>UVic-2.7</b>      | 3.26                                   | 2.29         | -38.54                                    | -67.40        |
| <b>Ensemble Mean</b> | <b>3.07</b>                            | <b>2.47</b>  | <b>-27.52</b>                             | <b>-52.18</b> |
| <b>±S.D.</b>         | <b>±0.68</b>                           | <b>±0.60</b> | <b>±11.93</b>                             | <b>±26.54</b> |



Supplementary Table 4 | Estimates of  $\beta$ ,  $\gamma$  and  $f(\beta, \gamma)$  for the nine CMIP5 models from the 1pctCO<sub>2</sub> climate-carbon cycle feedback experiments.

| Model                | $\beta^{BGC}$<br>(GtC ppm <sup>-1</sup> ) | $f(\beta, \gamma)\Delta T_A$<br>(GtC ppm <sup>-1</sup> ) | $\gamma^{COU-BGC}$<br>(GtC K <sup>-1</sup> ) | $\gamma^{RAD}$<br>(GtC K <sup>-1</sup> ) | $f(\beta, \gamma)\Delta C_A$<br>(GtC K <sup>-1</sup> ) | $f(\beta, \gamma)$<br>(GtC ppm <sup>-1</sup> K <sup>-1</sup> ) |
|----------------------|-------------------------------------------|----------------------------------------------------------|----------------------------------------------|------------------------------------------|--------------------------------------------------------|----------------------------------------------------------------|
| <b>BCC-CSM1</b>      | 2.06                                      | -0.045                                                   | -89.95                                       | -86.22                                   | -9.71                                                  | -11.35×10 <sup>-3</sup>                                        |
| <b>CanESM2</b>       | 1.66                                      | 0.004                                                    | -75.75                                       | -78.82                                   | 0.64                                                   | 0.75×10 <sup>-3</sup>                                          |
| <b>CESM1-BGC</b>     | 0.96                                      | 0.022                                                    | -17.27                                       | -23.77                                   | 5.04                                                   | 5.89×10 <sup>-3</sup>                                          |
| <b>HadGEM2</b>       | 1.92                                      | -0.185                                                   | -63.34                                       | -44.04                                   | -28.71                                                 | -33.57×10 <sup>-3</sup>                                        |
| <b>IPSL-CM5A-LR</b>  | 2.05                                      | -0.036                                                   | -63.06                                       | -65.13                                   | -6.08                                                  | -7.15×10 <sup>-3</sup>                                         |
| <b>MIROC-ESM</b>     | 1.55                                      | -0.041                                                   | -104.15                                      | -100.14                                  | -6.3                                                   | -7.41×10 <sup>-3</sup>                                         |
| <b>MPI-ESM-LR</b>    | 2.30                                      | -0.111                                                   | -102.38                                      | -88.09                                   | -18.98                                                 | -22.19×10 <sup>-3</sup>                                        |
| <b>NorESM-ME</b>     | 1.11                                      | -0.042                                                   | -21.69                                       | -14.08                                   | -9.76                                                  | -11.41×10 <sup>-3</sup>                                        |
| <b>UVic ESCM2.9</b>  | 1.74                                      | -0.058                                                   | -93.67                                       | -85.44                                   | -12.59                                                 | -14.60×10 <sup>-3</sup>                                        |
| <b>Ensemble Mean</b> | <b>1.71</b>                               | <b>-0.055</b>                                            | <b>-70.14</b>                                | <b>-65.08</b>                            | <b>-9.6</b>                                            | <b>-11.22×10<sup>-3</sup></b>                                  |
| <b>±S.D.</b>         | <b>±0.44</b>                              | <b>0.062</b>                                             | <b>±32.43</b>                                | <b>±30.74</b>                            | <b>±10.03</b>                                          | <b>±11.72×10<sup>-3</sup></b>                                  |

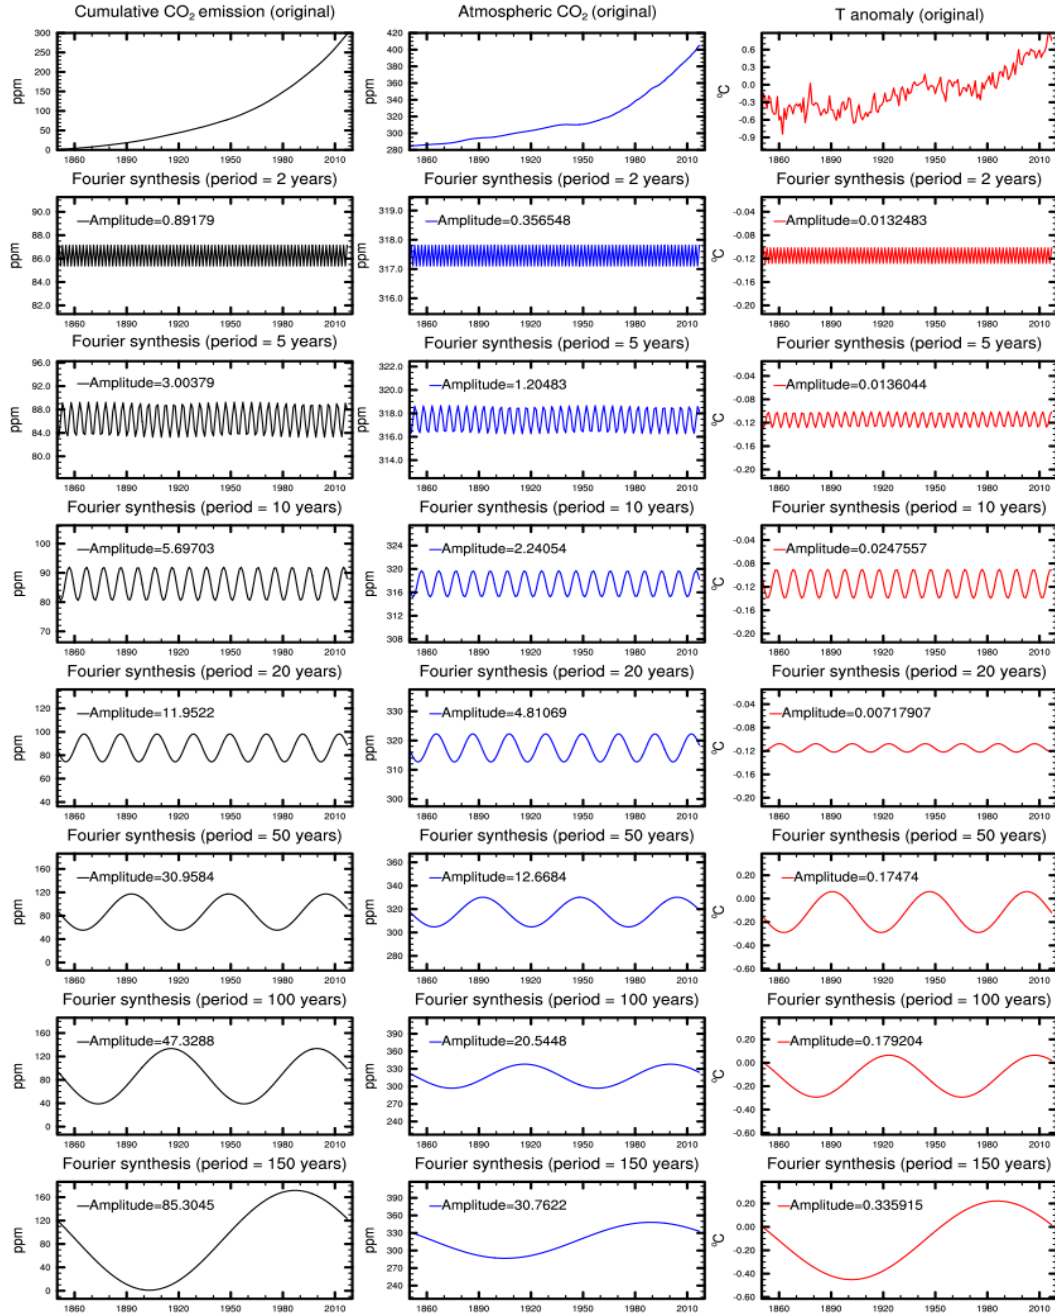

**Supplementary Fig. 1 | Fourier analysis of historical anthropogenic cumulative CO<sub>2</sub> emission, atmospheric CO<sub>2</sub>, and global mean temperature anomaly over 1850-2017. Left panels, Fourier synthesis time series of cumulative CO<sub>2</sub> emission mean ( $C_E$ ) at periods of 2, 5, 10, 20, 50, 100, 150 years, respectively. **Middle panels**, Fourier synthesis time series of atmospheric CO<sub>2</sub> ( $C_A$ ) at periods of 2, 5, 10, 20, 50, 100, 150 years, respectively. **Right panels**, Fourier synthesis time series of global mean temperature ( $T_A$ ) from HadCRUT4 at periods of 2, 5, 10, 20, 50, 100, 150 years, respectively. Amplitudes for  $C_E$ ,  $C_A$ , and  $T_A$  at all timescales ( $k$ ) were used for estimating  $TCRE^{-1}_k$  and  $\alpha^{-1}_k$  in this study (Methods).**

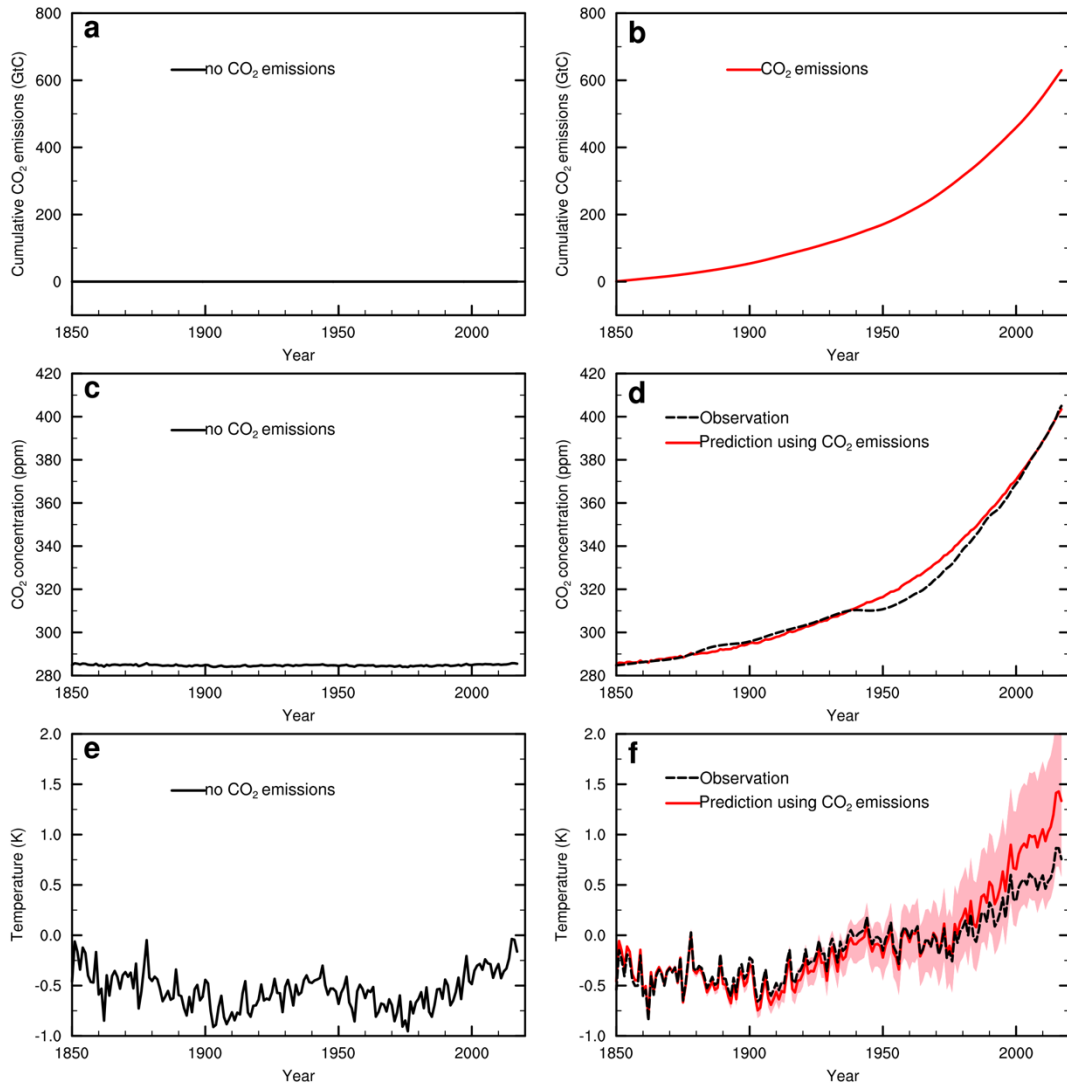

**Supplementary Fig. 2 | Simulations of CO<sub>2</sub> and temperature using a simple three parameters box model for climate-carbon cycle feedback analysis.** The box model (see equations (32-33) in Method) was used here to predict temperature and CO<sub>2</sub> over 1850-2017 by setting  $\beta=3.22 \text{ GtC ppm}^{-1}$ ,  $\gamma^*=-10.9 \text{ GtC K}^{-1}$ ,  $s=3\pm 1.5 \text{ K}$  and  $\varepsilon$  being the detrended  $T_A$  anomaly time series from HadCRUT4 using annual cumulated CO<sub>2</sub> emissions as input (**b, d, f**) or no CO<sub>2</sub> emissions input (**a, c, e**). Result shows predicted atmospheric CO<sub>2</sub> driven by CO<sub>2</sub> emissions is very close to the observation ( $R^2 = 0.99$ ,  $RMSE = 3.5 \text{ ppm}$ ) (**d**), but predicted temperature shows larger increasing trend from 1980-2017 ( $R^2 = 0.96$ ,  $RMSE = 0.17 \text{ K}$ ) (**f**). The shaded area in plots are the uncertainty due to  $s$  varied from 1.5 to 4.5 K.

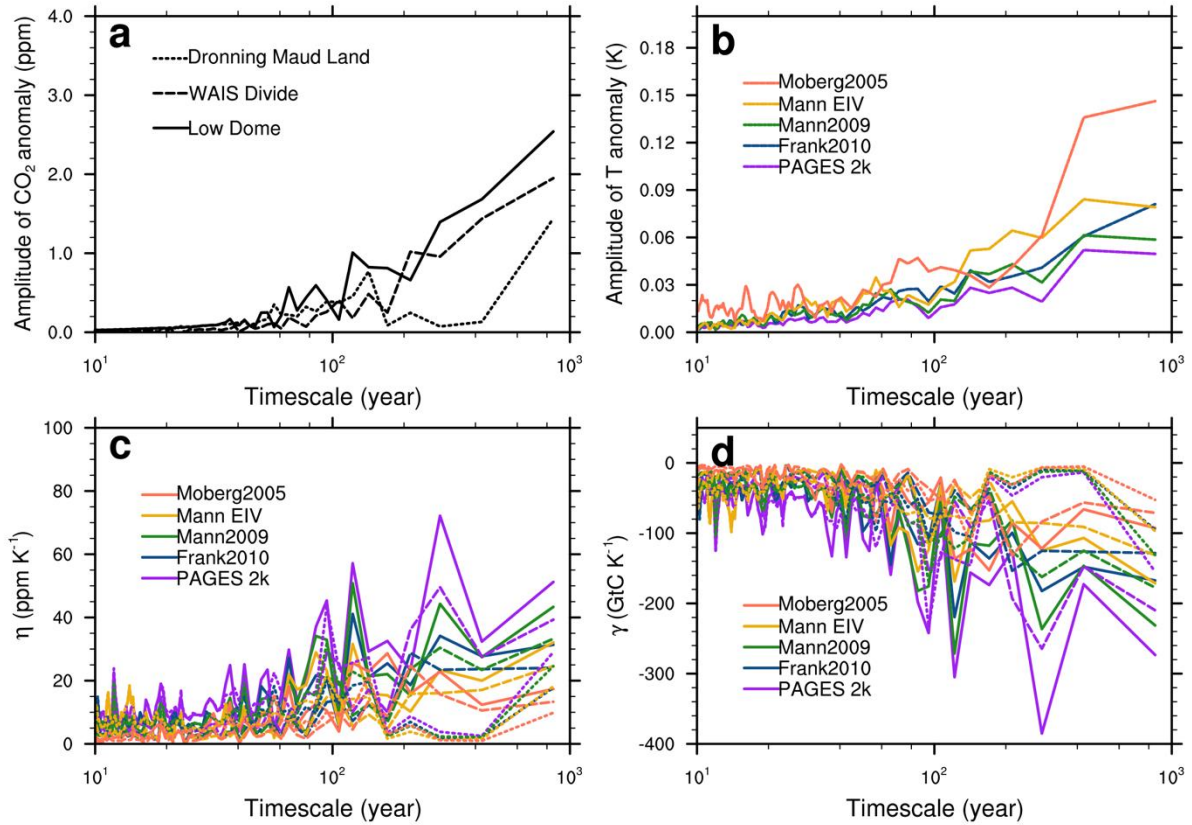

**Supplementary Fig. 3 | Climate variability and feedback across timescales for the period 1000-1850.** **a**, Amplitude spectrum for atmospheric  $\text{CO}_2$  from three Antarctic ice-core  $\text{CO}_2$  records (Low Dome, WAIS Divide and Dronning Maud Land) using Fourier analysis. **b**, Same as a but for hemispheric mean temperature from 5 reconstructions (PAGES 2k, Frank2010, Mann2009, Mann EIV, Moberg2005). **c**, Ensemble estimates of  $\eta$  across timescales from 15 combinations of 3 ice-core  $\text{CO}_2$  records  $\times$  5 reconstructed temperature reconstructions. **d**, Same as c but for the climate change feedback parameter  $\gamma$ .

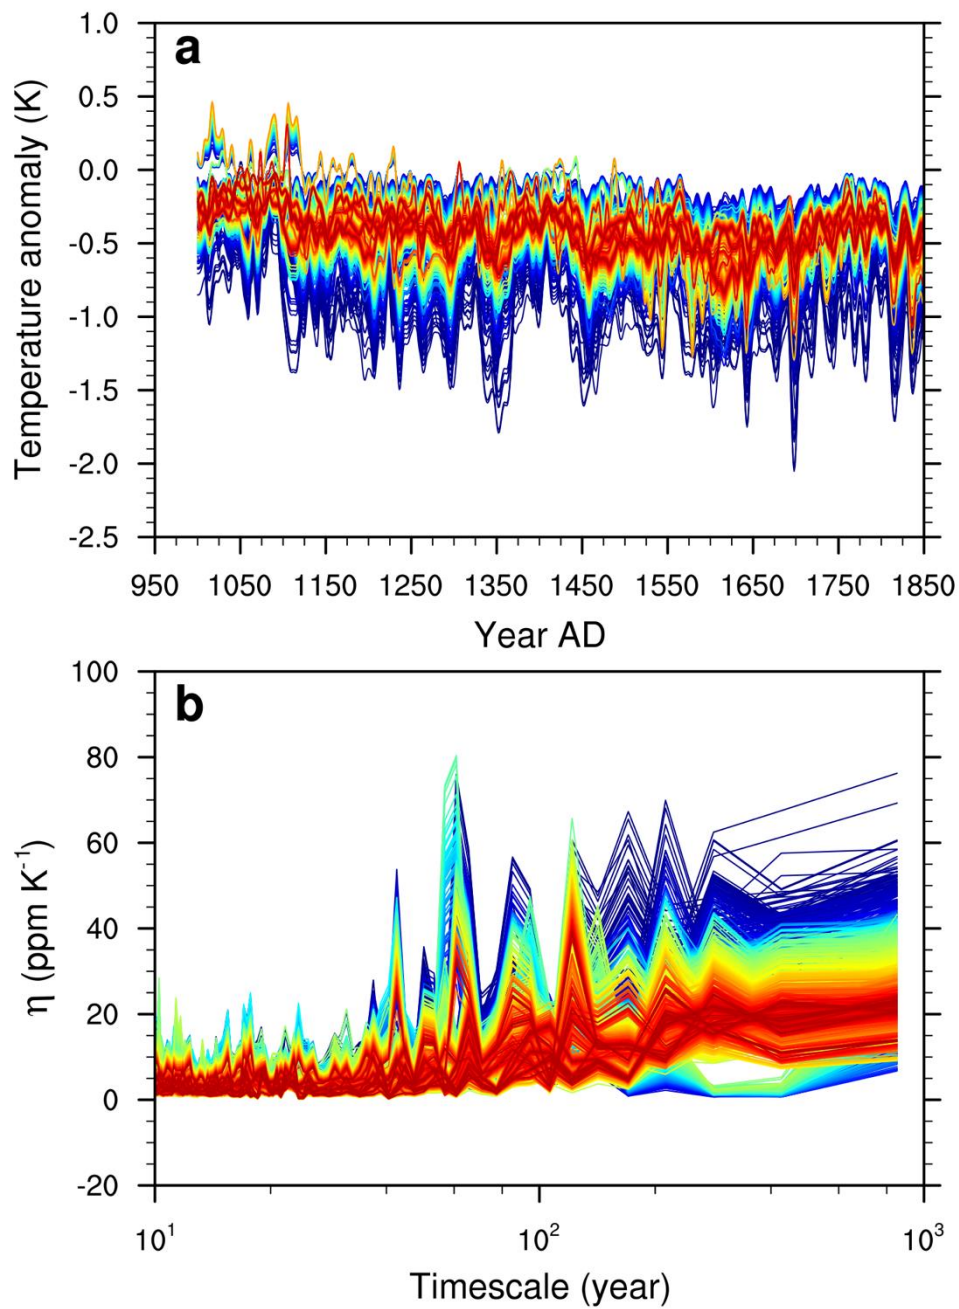

**Supplementary Fig. 4 | Large ensemble estimates of temperature variability and climate-carbon cycle feedback. a**, 521 estimates of calibrated temperature anomaly reconstructions over the period 1000-1850 from Frank et al. 2010. **b**, Ensemble estimates of  $\eta$  across timescales from >1,500 members (based on 3 ice-core CO<sub>2</sub> records  $\times$  521 calibrated temperature reconstructions, EnOBS) over the period 1000-1850. Coloring of ensemble members in **a** and **b** are based on distance from their ensemble mean.

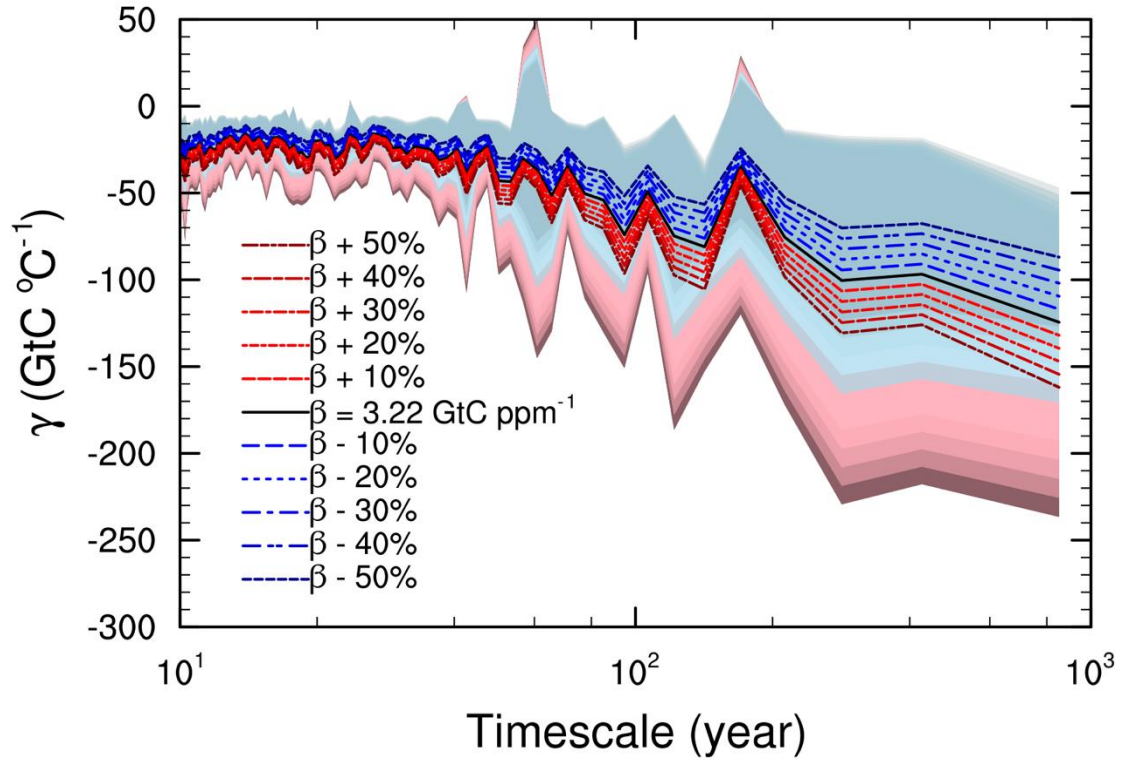

**Supplementary Fig. 5 | Error sensitivity analysis of  $\gamma$  on different timescales in response to changes in  $\beta$ .** The  $\beta$  is 3.22 GtC ppm<sup>-1</sup> with an uncertainty of 10%, estimated from observational datasets over 1880-2017. We applied this value of  $\beta$  to estimate pre-industrial  $\gamma$  on timescales from 10 to 1000 years using the EnOBS ensemble  $\eta$  across timescales from >1,500 members (based on 3 ice-core CO<sub>2</sub> records  $\times$  521 calibrated temperature reconstructions<sup>6</sup>). This figure shows that when the  $\beta$  has overestimations (or underestimations) of 10% to 50% of its industrial observation-based value (3.22 GtC ppm<sup>-1</sup>), the  $\gamma$  shows underestimations (or overestimations) of about 6% to 30%. This largest change of 30% ( $\sim 25$  GtC K<sup>-1</sup>) in  $\gamma_{100\text{yr}}$  is still smaller than the uncertainty of  $\gamma_{100\text{yr}}$  (a standard deviation of 41.90 GtC K<sup>-1</sup>) that was mainly caused by the large divergences in the three ice-core CO<sub>2</sub> records and reconstructed temperatures.

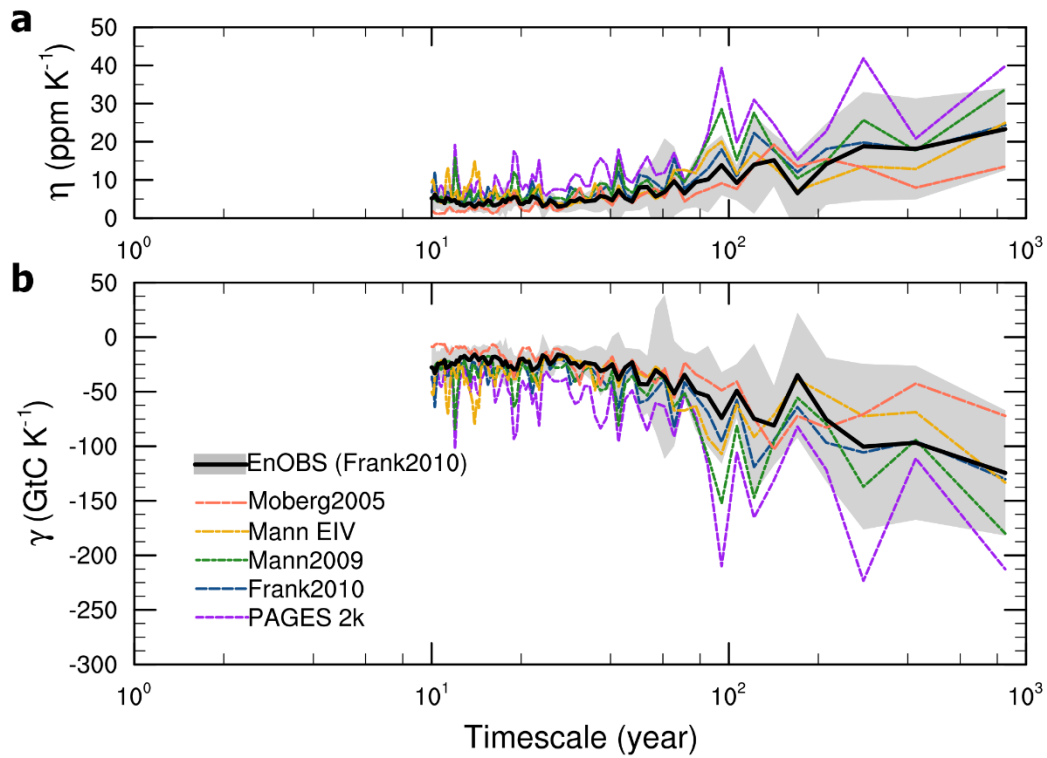

**Supplementary Fig. 6 | Ensemble estimates of climate-carbon feedback parameters for the period 1000-1850.** **a**, Evolution of the  $\eta$  estimates across timescales of 10-850 years derived from 5 reconstructed temperature members (on average over 3 ice-core  $CO_2$  record combinations) and from EnOBS ensemble mean with uncertainty ( $\pm 1\sigma$ ) of >1,500 members (3 ice-core  $CO_2 \times 521$  calibrated temperature reconstructions) for 1000-1850. **b**, Same as **a**, but for evolution of the  $\gamma$  estimates across timescales of 10-850 years.

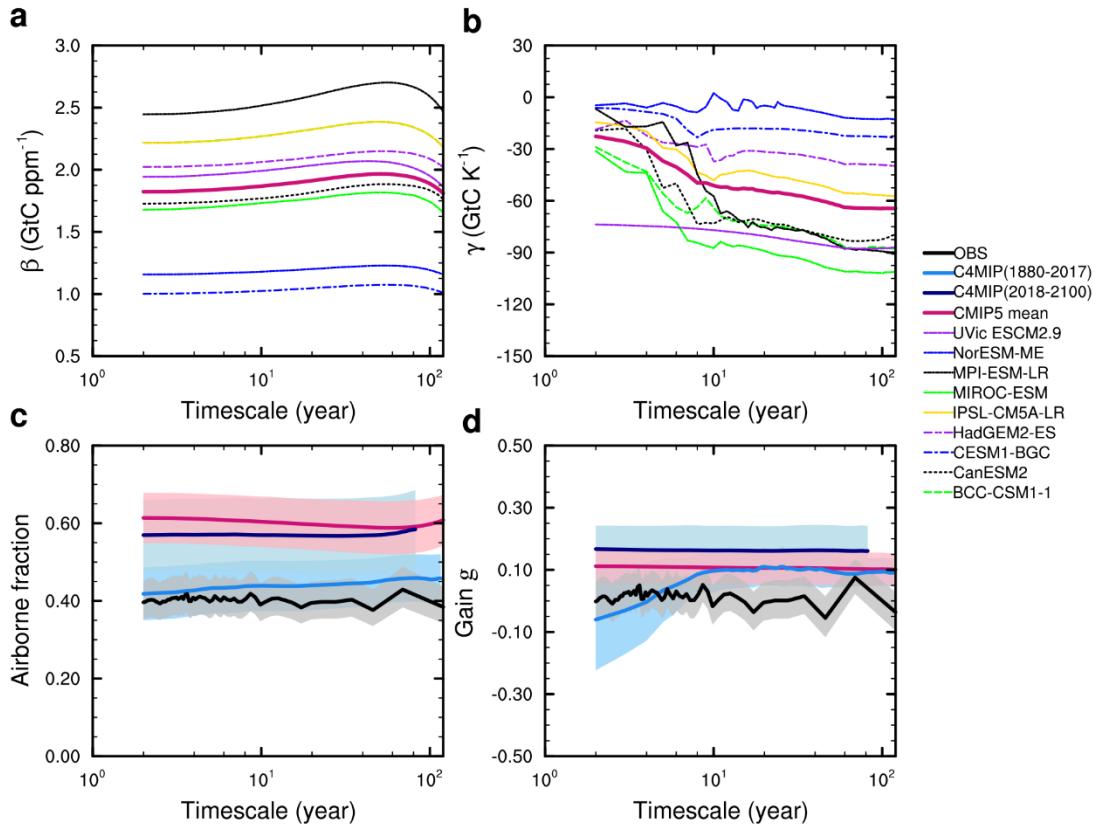

**Supplementary Fig. 7 | Estimates of the climate-carbon cycle feedback parameters over timescales derived from the CMIP5 and C<sup>4</sup>MIP models.** **a**, Evolution of the  $\beta^{GBC}$  estimates across timescales derived from the biogeochemically coupled simulations of nine CMIP5 models. **b**, Same as **a** but for the  $\gamma^{RAD}$  estimates from the radiatively coupled simulations. **c**, Evolution of the cumulative airborne fraction ( $AF$ ) estimates (mean  $\pm 1\sigma$ ) across timescales from observations and from the fully coupled simulations of the CMIP5 and the C<sup>4</sup>MIP models. **d**, Same as **c** but for the feedback gain factor ( $g$ ) derived from the  $\beta$  and  $AF$  estimates. Observation-based estimates were calculated for the period 1880-2017. All CMIP5 model simulations were forced by 1% year<sup>-1</sup> increasing atmospheric CO<sub>2</sub> concentrations over 140 years with an initial level at 285 ppm<sup>-1</sup>. All C<sup>4</sup>MIP models were forced by the historical and the prescribed IPCC SRES A2 CO<sub>2</sub> emissions scenario for the 1860-2100 period.



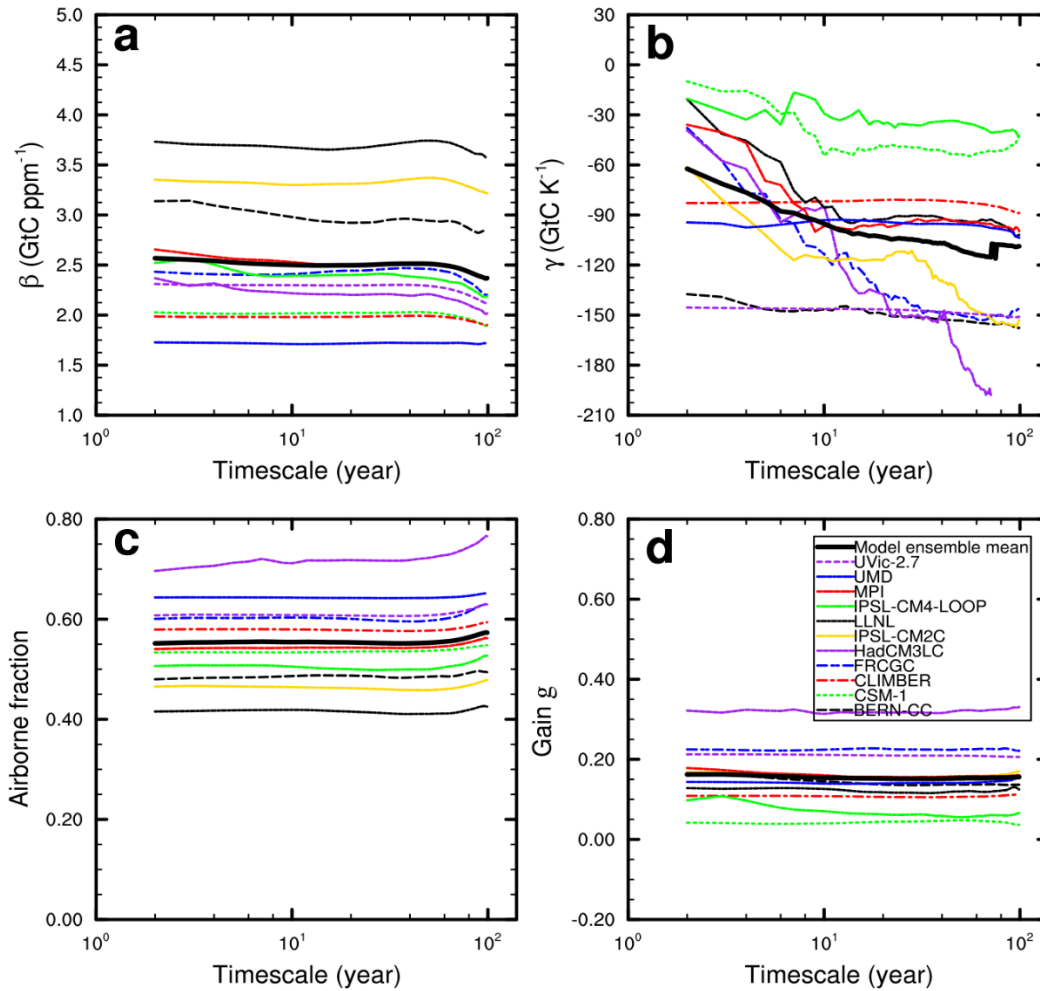

**Supplementary Fig. 8 | Estimates of the climate-carbon cycle feedback parameters over timescales from the coupled/uncoupled simulations of eleven C<sup>4</sup>MIP models for the period 1880-2100.** **a**, Evolution of the  $\beta^{BGC}$  estimates across timescales from the uncoupled simulations with equation (S1). **b**, Evolution of the  $\gamma^{COU-BGC}$  estimates across timescales from the fully-coupled simulations with equation (S2). **c**, Evolution of the airborne fraction ( $AF$ ) estimates across timescales from the fully-coupled simulations. **d**, Evolution of the feedback gain factor ( $g$ ) estimates across timescales from the  $\beta$  and  $AF$  estimates. All C<sup>4</sup>MIP models simulations were forced by anthropogenic fossil fuel CO<sub>2</sub> emissions for the historical and the prescribed IPCC SRES A2 CO<sub>2</sub> emissions scenario for the 1860-2100 period.

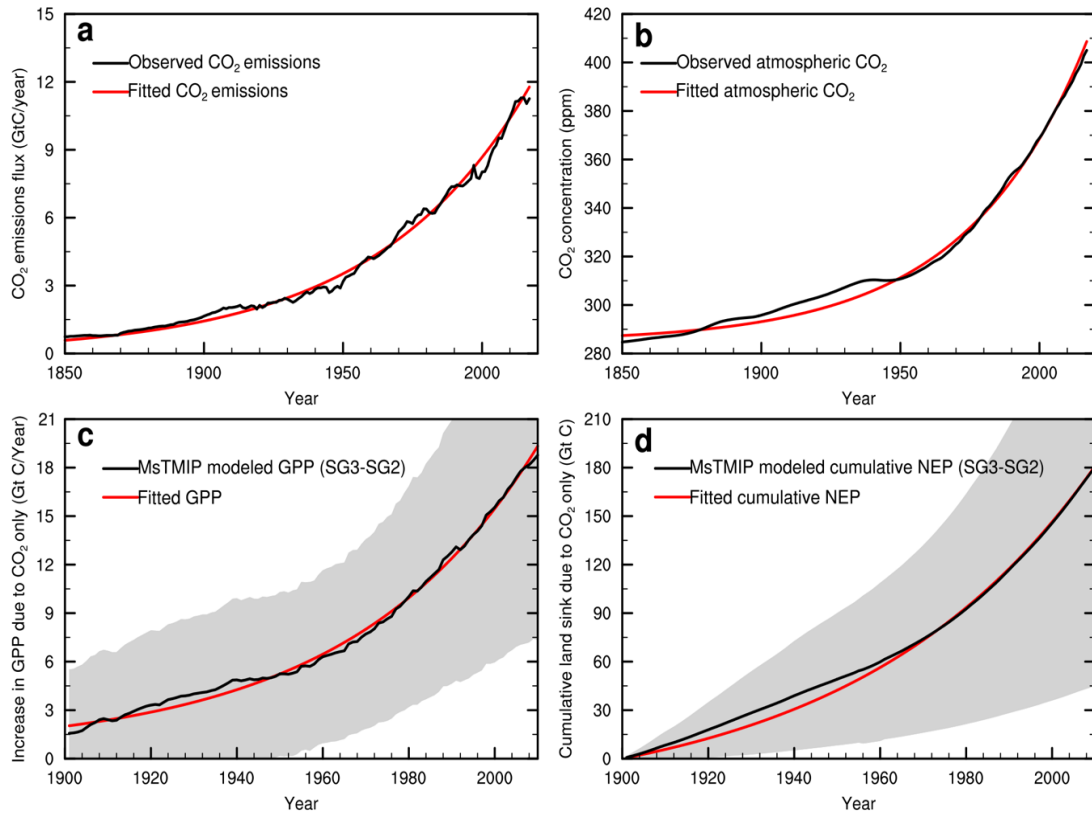

**Supplementary Fig. 9 | Exponential growths of global annual CO<sub>2</sub> emissions flux, atmospheric CO<sub>2</sub> concentration, GPP flux, and cumulative land carbon sink during industrial period.** **a**, Comparison of observed and fitted CO<sub>2</sub> emissions (Gt C year<sup>-1</sup>) over 1850-2017. The fitted CO<sub>2</sub> emissions (in red) was calculated by  $y = 0.27e^{0.018t}$ . **b**, Comparison of observed and fitted atmospheric CO<sub>2</sub> (ppm) over 1850-2017. The fitted atmospheric CO<sub>2</sub> (in red) was calculated by  $y = 2.6e^{0.023t} + 285$ . **c**, Comparison of modeled ensemble mean GPP and fitted GPP increase (Gt C year<sup>-1</sup>) over 1901-2010. The fitted GPP increase (in red) was calculated by  $y = 1.5e^{0.023t} + 0.5$ . **d**, Comparison of modeled ensemble mean cumulative NEP and fitted cumulative NEP (Gt C) over 1901-2010. The fitted cumulative NEP (in red) was calculated by  $y = 29e^{0.018t} - 29$ . The modeled GPP and NEP were calculated from the differences between experiment SG3 and experiment SG2 of an ensemble of 14 MsTMIP terrestrial ecosystem models. The shaded area in **d** and **c** represents an uncertainty of one standard deviation (in grey-shaded) in MsTMIP ensemble simulations. In the experiment SG2 of the MsTMIP project <sup>7</sup>, all 14 terrestrial ecosystem models were forced by historical observational climate and land use change data over 1901-2010 and a constant CO<sub>2</sub> value of 1901 over 1901-2010. In the experiment SG3, all 14 MsTMIP models were forced by historical observational climate, land use change data, and annual CO<sub>2</sub> values over 1901-2010. The difference of SG3-SG2 represents that the MsTMIP models were driven only by increasing atmospheric CO<sub>2</sub> over 1901-2010.

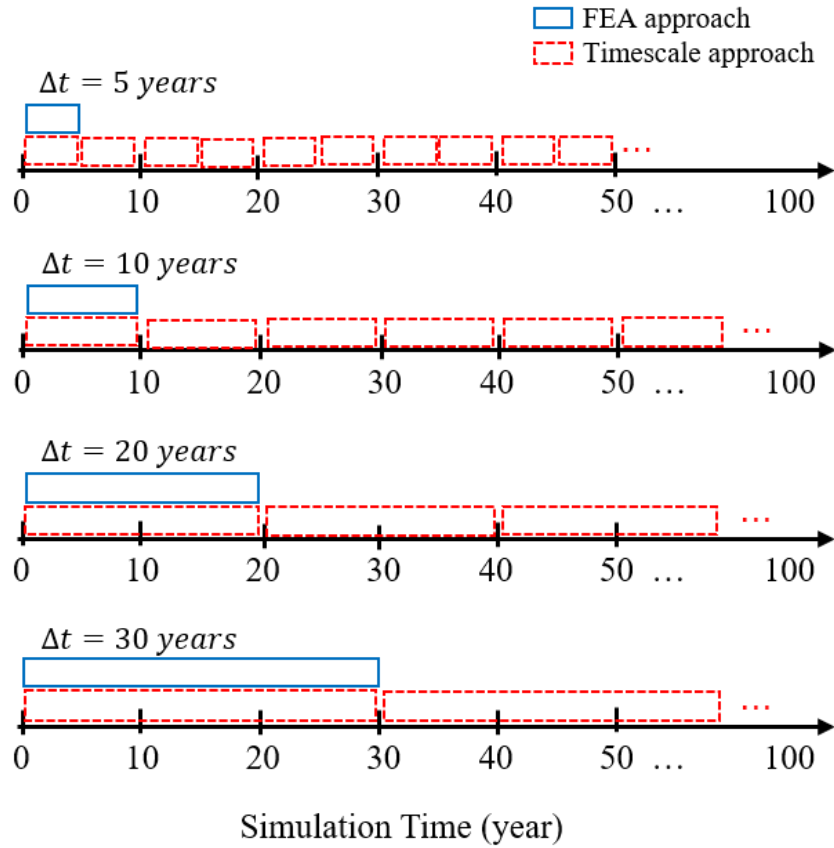

**Supplementary Fig. 10 | A diagram to show the difference between the FEA approach and the timescale approach used in this study.** The FEA approach is used to calculate  $\beta^{BGC}$  and  $\gamma^{RAD}$  for different time intervals since the first simulation year (boxes in blue for different  $\Delta t$  intervals), and the timescale approach is used to calculate  $\beta_k^{BGC}$  and  $\gamma_k^{RAD}$  on different time scales (boxes in red for different  $\Delta t$  intervals), which are the average of all  $\beta^{BGC}$  and  $\gamma^{RAD}$  from all time intervals ( $n$ ) of  $\Delta t$  over the period of  $N$  years. See also equations (S1-S2), more details about the timescale approach is shown in Texts 1-2.

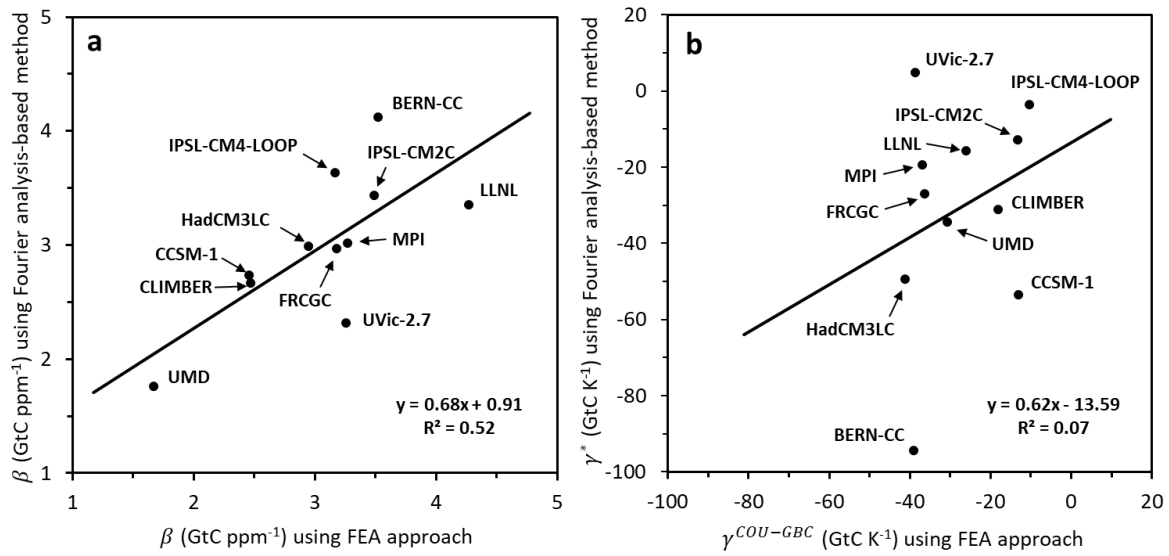

**Supplementary Fig. 11 | Comparison of  $\beta$  and  $\gamma^*$  during 1880-2017 for the C<sup>4</sup>MIP models from between Fourier analysis-based method and the FEA-based approach.** The historical observed CO<sub>2</sub> emissions, and global atmospheric CO<sub>2</sub> concentration, global mean near-surface temperature, global land and ocean carbon uptakes derived from the COU (fully-coupled) simulations of 11 C<sup>4</sup>MIP models were used. Our result showed that the  $\beta$  for the C<sup>4</sup>MIP ensemble from the Fourier analysis-based method is  $2.997 \pm 0.556$  GtC ppm<sup>-1</sup>, which is close to the value of  $3.064 \pm 0.680$  GtC ppm<sup>-1</sup> for the C<sup>4</sup>MIP from the FEA approach. The  $\gamma^*$  for the C<sup>4</sup>MIP ensemble estimated using the Fourier analysis-based method is  $-30.66 \pm 18.72$  GtC K<sup>-1</sup>, which is about 10% larger in magnitude than the FEA approach-based estimate ( $-27.52 \pm 11.92$  GtC K<sup>-1</sup>). Then, the Fourier analysis-based  $g$  for the C<sup>4</sup>MIP using equation (10) is  $0.09 \pm 0.05$ , which is consistent with the FEA approach-based  $g$  ( $0.09 \pm 0.04$ ).

## References

1. Arora, V. K., *et al.* Carbon–Concentration and Carbon–Climate Feedbacks in CMIP5 Earth System Models. *J. Clim.* **26**, 5289-5314 (2013).
2. Friedlingstein, P., *et al.* Climate–Carbon Cycle Feedback Analysis: Results from the C4MIP Model Intercomparison. *J. Clim.* **19**, 3337-3353 (2006).
3. Friedlingstein, P., Dufresne, J. L., Cox, P. M. & Rayner, P. How positive is the feedback between climate change and the carbon cycle? *Tellus B* **55**, 692-700 (2003).
4. Gregory, J. M., Jones, C. D., Cadule, P. & Friedlingstein, P. Quantifying Carbon Cycle Feedbacks. *J. Clim.* **22**, 5232-5250 (2009).
5. Schwinger, J., *et al.* Nonlinearity of Ocean Carbon Cycle Feedbacks in CMIP5 Earth System Models. *J. Clim.* **27**, 3869-3888 (2014).
6. Frank, D. C., *et al.* Ensemble reconstruction constraints on the global carbon cycle sensitivity to climate. *Nature* **463**, 527-530 (2010).
7. Huntzinger, D. N., *et al.* Uncertainty in the response of terrestrial carbon sink to environmental drivers undermines carbon-climate feedback predictions. *Scientific reports* **7**, 4765 (2017).
